# Supplementary material
Source: publisher figshare collection journal article supplement (https://acs.figshare.com/ndownloader/files/4588036)
Supplement: Supplementary file 1 [file 4588036]

Supporting Information for “**Electron Transport and Recombination in Dye-Sensitized TiO<sub>2</sub> Solar Cells Fabricated without Sintering Process**”

Shogo Mori<sup>\*†</sup>, Kenji Sunahra<sup>†</sup>, Yosuke Fukai<sup>†</sup>, Taisuke Kanzaki<sup>††</sup>, Yuji Wada<sup>††</sup> and Shozo Yanagida<sup>\*†††</sup>

<sup>†</sup>Division of Chemistry and Material, Faculty of Textile Science and Technology, Shinshu University, Ueda, 386-8567, Japan

<sup>††</sup>Material and Life Science, Graduate School of Engineering, Osaka University, Suita, Osaka 565-0871 Japan

<sup>†††</sup>Center for Advanced Science and Innovation, Osaka University, Suita, Osaka 565-0871 Japan

Table S1. I-V characteristics of DSCs using TiO<sub>2</sub> films prepared with and without sintering processes. One of them for each condition was the same shown in Table 1.

| Sample      | Thickness / $\mu\text{m}$ | Voc / V | Isc / $\text{mAcm}^{-2}$ | FF   | Eff / % |
|-------------|---------------------------|---------|--------------------------|------|---------|
| 450 °C _E50 | 4.0                       | -0.760  | 7.6                      | 0.70 | 4.1     |
| 450 °C _E50 | 4.3                       | -0.773  | 8.3                      | 0.71 | 4.5     |
| 450 °C _E25 | 4.0                       | -0.766  | 8.4                      | 0.68 | 4.4     |
| 450 °C _E25 | 4.2                       | -0.748  | 7.6                      | 0.70 | 4.0     |
| 450 °C _E15 | 4.0                       | -0.775  | 8.2                      | 0.70 | 4.4     |
| 450 °C _E15 | 3.8                       | -0.778  | 7.5                      | 0.70 | 4.1     |
| 80 °C _E50  | 3.6                       | -0.711  | 5.3                      | 0.70 | 2.6     |
| 80 °C _E50  | 3.7                       | -0.688  | 5.5                      | 0.71 | 2.7     |
| 80 °C _E25  | 3.7                       | -0.742  | 6.0                      | 0.71 | 3.2     |
| 80 °C _E25  | 4.1                       | -0.721  | 5.0                      | 0.72 | 2.6     |
| 80 °C _E15  | 4.2                       | -0.763  | 6.7                      | 0.65 | 3.3     |
| 80 °C _E15  | 3.8                       | -0.739  | 6.1                      | 0.71 | 3.2     |

Table S2. I-V characteristics of DSCs using  $\text{TiO}_2$  films prepared with 450 °C heating process. The  $\text{TiO}_2$  films were prepared from a colloidal suspension of P25 with Triton X and acetylacetone.<sup>a</sup>

| Sample      | Thickness / $\mu\text{m}$ | Voc / V | Isc / $\text{mAcm}^{-2}$ | FF   | Eff / % |
|-------------|---------------------------|---------|--------------------------|------|---------|
| 450 °C _E50 | 3.9                       | -0.73   | 5.9                      | 0.71 | 3.0     |
| 450 °C _E50 | 4.0                       | -0.71   | 5.7                      | 0.70 | 2.8     |
| 450 °C _E25 | 3.7                       | -0.74   | 5.8                      | 0.71 | 3.1     |
| 450 °C _E25 | 3.9                       | -0.74   | 6.0                      | 0.71 | 3.2     |
| 450 °C _E15 | 3.9                       | -0.76   | 5.8                      | 0.71 | 3.1     |
| 450 °C _E15 | 3.9                       | -0.75   | 5.9                      | 0.71 | 3.1     |

<sup>a</sup>The additives made it easy to prepare films having flat surface, and usually it results in better reproducibility.

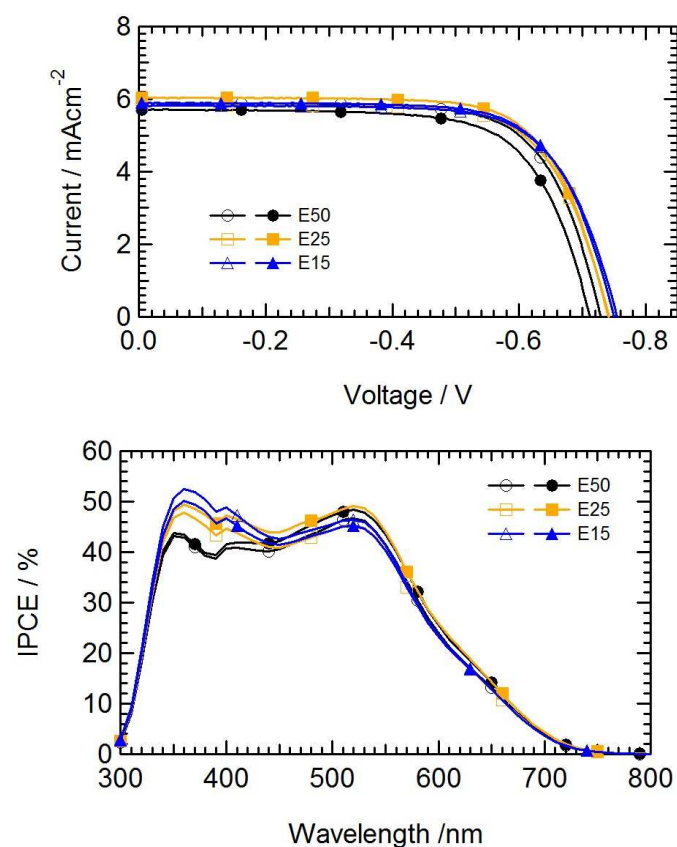

Figure S1. I-V curves and IPCE of the solar cells shown in Table S2.

In order to examine the effect of annealing temperature, colloidal suspension was prepared from P25 particles as it is purchased, and P25 particles heated without water at 450 °C for 30 min in air. This is to have P25 experience a condition of 450 °C. Then, the paste was applied to TCO and heated at 450 °C for 30 min or 80 °C for 12 hours. Table S3 summarizes the I-V characteristics of DSCs prepared from the electrodes. Figure S2 shows the diffusion coefficients, lifetime and electron density in the DSCs. Electrolyte was E50.

Table S3. I-V characteristics of DSCs measured under simulated one sun conditions.

| Sample number | Heating temp. for particle / °C | Heating temp for film / °C | Thickness / $\mu\text{m}$ | Voc / V | Isc / $\text{mAcm}^{-2}$ | FF   | Eff / % |
|---------------|---------------------------------|----------------------------|---------------------------|---------|--------------------------|------|---------|
| 641           | 450                             | 450                        | 4.1                       | -0.768  | 8.92                     | 0.71 | 4.86    |
| 642           | 450                             | 450                        | 3.9                       | -0.756  | 8.32                     | 0.70 | 4.43    |
| 643           | 450                             | 450                        | 4.4                       | -0.774  | 8.65                     | 0.72 | 4.81    |
| 644           | 450                             | 80                         | 4.0                       | -0.744  | 6.85                     | 0.72 | 3.67    |
| 645           | 450                             | 80                         | 4.0                       | -0.699  | 6.77                     | 0.71 | 3.34    |
| 646           | 450                             | 80                         | 4.3                       | -0.744  | 7.60                     | 0.72 | 4.09    |
| 651           | N/A                             | 450                        | 4.2                       | -0.726  | 8.65                     | 0.71 | 4.47    |
| 652           | N/A                             | 450                        | 4.2                       | -0.750  | 9.24                     | 0.71 | 4.92    |
| 653           | N/A                             | 450                        | 4.2                       | -0.723  | 8.95                     | 0.70 | 4.52    |
| 654           | N/A                             | 80                         | 4.3                       | -0.762  | 7.17                     | 0.73 | 3.99    |
| 655           | N/A                             | 80                         | 4.1                       | -0.744  | 7.19                     | 0.73 | 3.88    |
| 656           | N/A                             | 80                         | 4.0                       | -0.699  | 7.14                     | 0.71 | 3.57    |

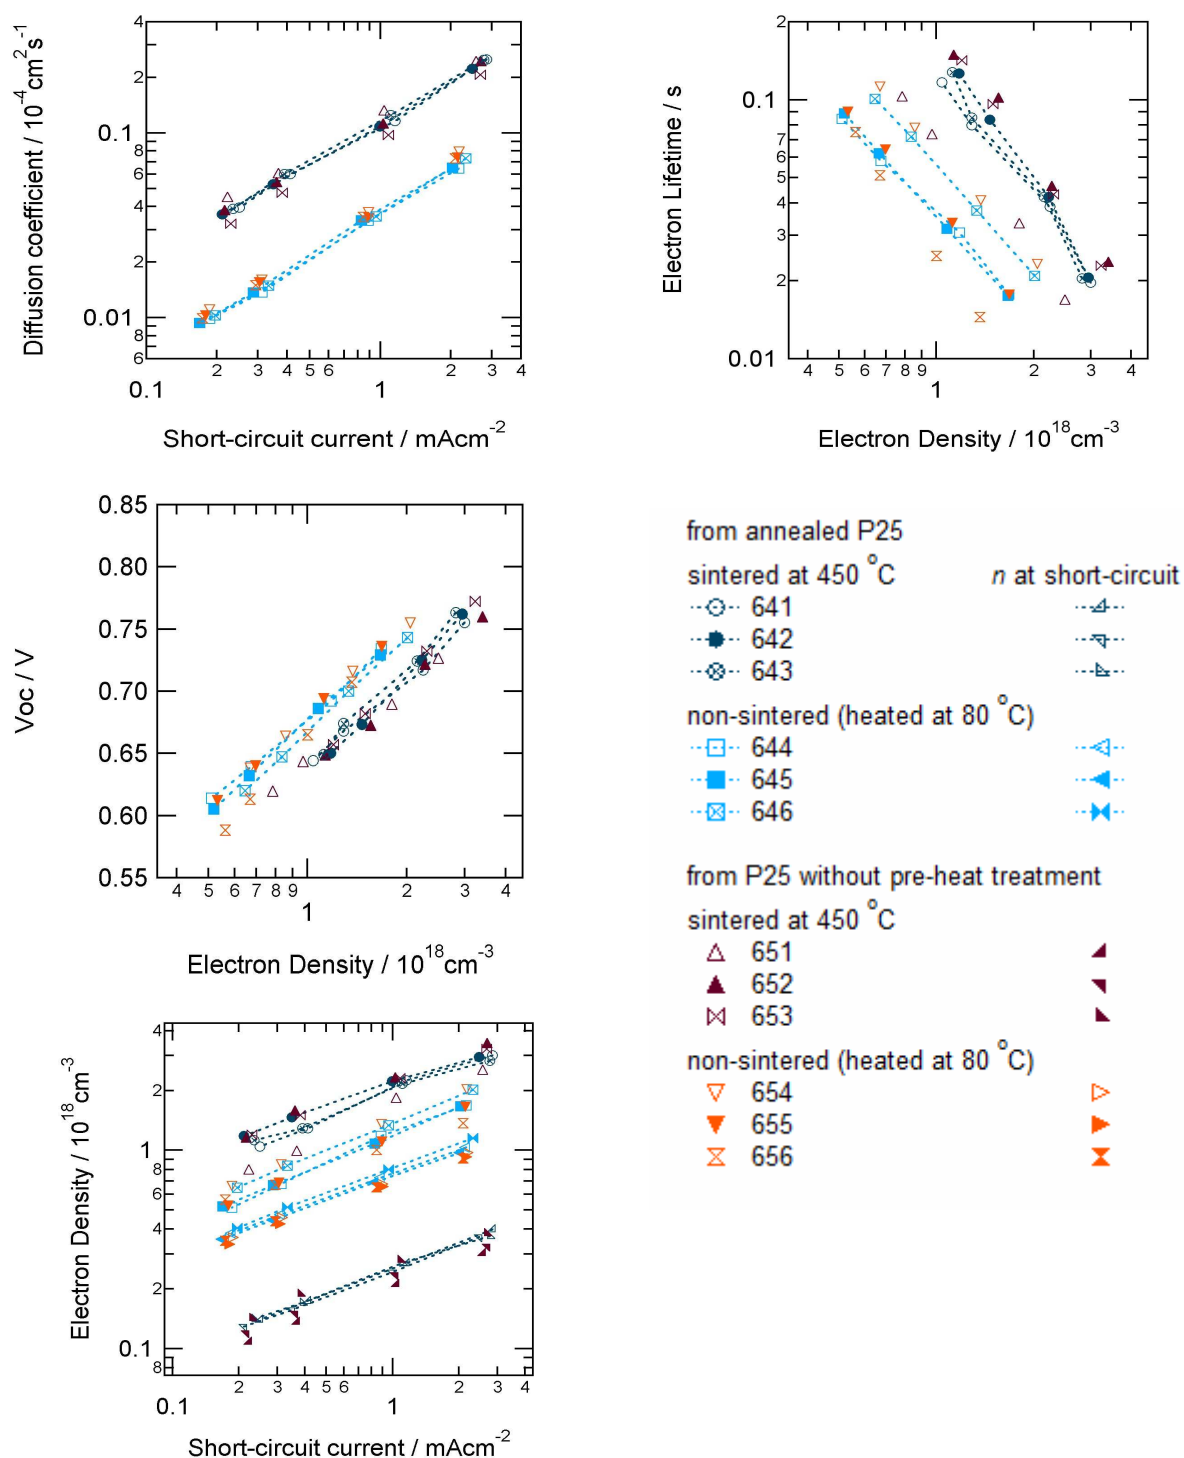

**Figure S2.** Electron Diffusion coefficient, lifetime and density in DSCs prepared from P25 particles with and without pre-heat treatment.
